# Supplementary material for: Minichromosome maintenance 6 complex component identified by bioinformatics analysis and experimental validation in esophageal squamous cell carcinoma
Source: PubMed Central journal article supplement — Oncol Rep. 2020 Jun 23;44(3):987–1002. doi: 10.3892/or.2020.7658 (PMC7388536; doi:10.3892/or.2020.7658), 2020-06-23
Supplement: Supplementary_Data.pdf [file Supplementary_Data.pdf]

Table SI. Changes in MCM6 expression at the transcriptional level between different subtypes of esophagus cancer and normal tissues (Oncomine database).

| Subtype of esophagus cancer | P-value  | Fold change | Sample | (Refs.)     |
|-----------------------------|----------|-------------|--------|-------------|
| ESCC                        | 1.15E-24 | 2.419       | 106    | Su (50)     |
| ESCC                        | 4.32E-7  | 2.287       | 34     | Hu (51)     |
| EAC                         | 9.03E-4  | 1.972       | 24     | Kimchi (52) |
| Barrett's esophagus         | 0.127    | 1.265       | 24     | Kimchi (52) |
| EAC                         | 0.332    | 1.047       | 52     | Wang (53)   |
| Barrett's esophagus         | 0.418    | 1.053       | 52     | Wang (53)   |
| EAC                         | 0.003    | 2.987       | 48     | Hao (54)    |
| Barrett's esophagus         | 0.098    | 1.277       | 48     | Hao (54)    |
| EAC                         | 0.027    | 1.133       | 118    | Kim (55)    |
| Barrett's esophagus         | 0.685    | -1.036      | 118    | Kim (55)    |

ESCC, esophageal squamous cell carcinoma; EAC, esophageal adenocarcinoma.
